# Supplementary material for: Preparation and application of KCC-1@ZIF-8 for the solid extraction of tetracycline with high adsorption capacity
Source: Royal Society of Chemistry journal article supplement (doi:10.1039/d4ay00399c), 2024-01-01
Supplement: d4ay00399c1.pdf [file d4ay00399c1.pdf]

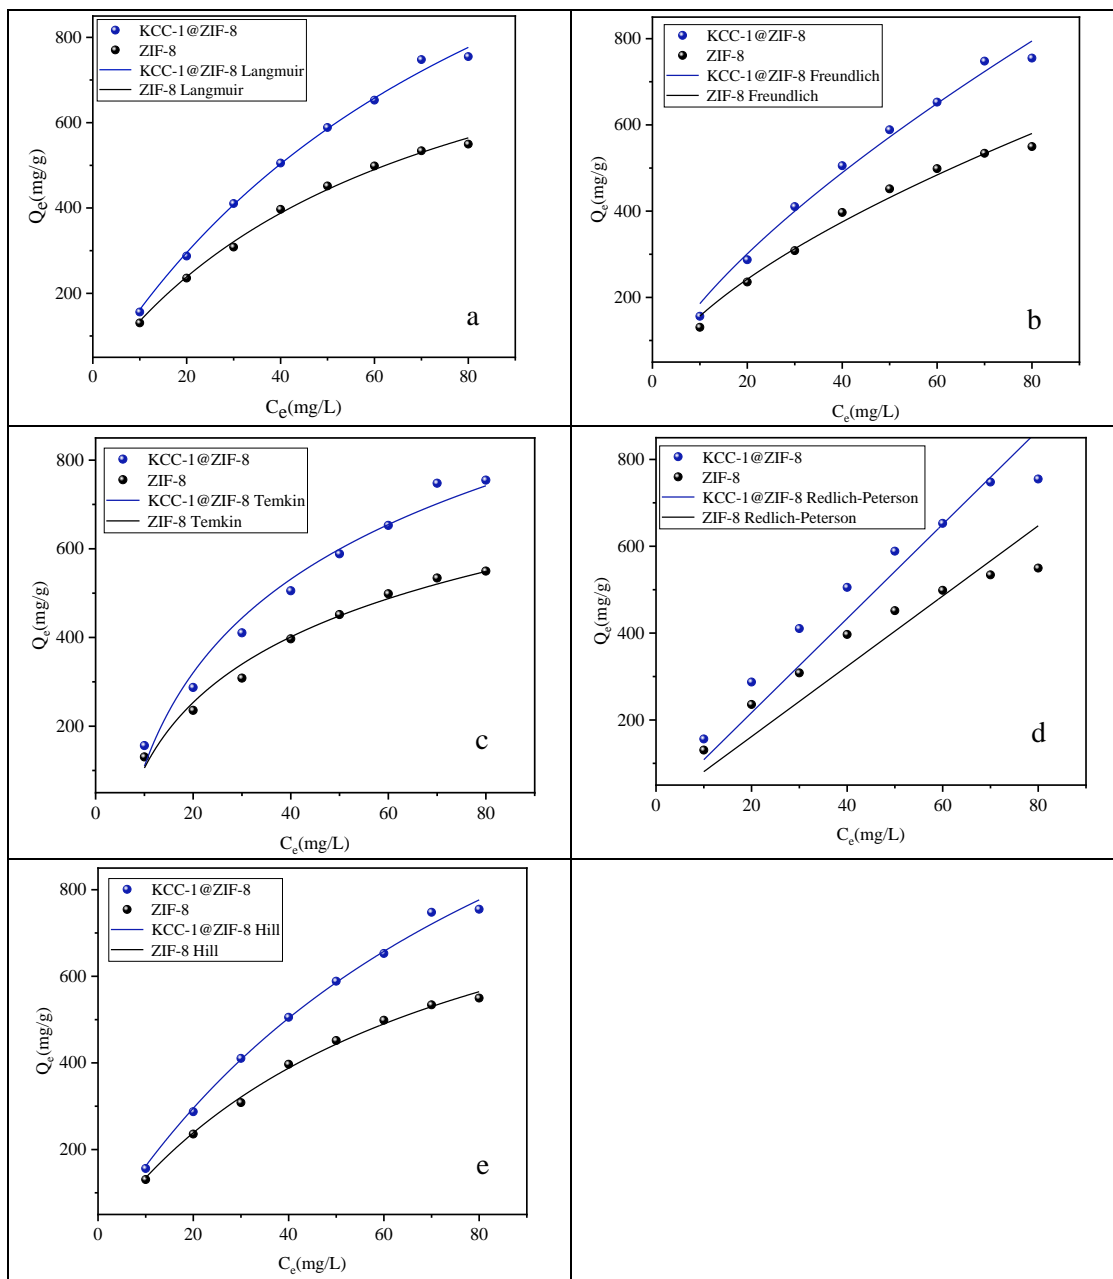

Fig. S1. Langmuir(a), Freundlich(b), Temkin(c), Redlich-Peterson(d) and Hill(e) isotherms models of ZIF-8 and ZIF-8@KCC-1

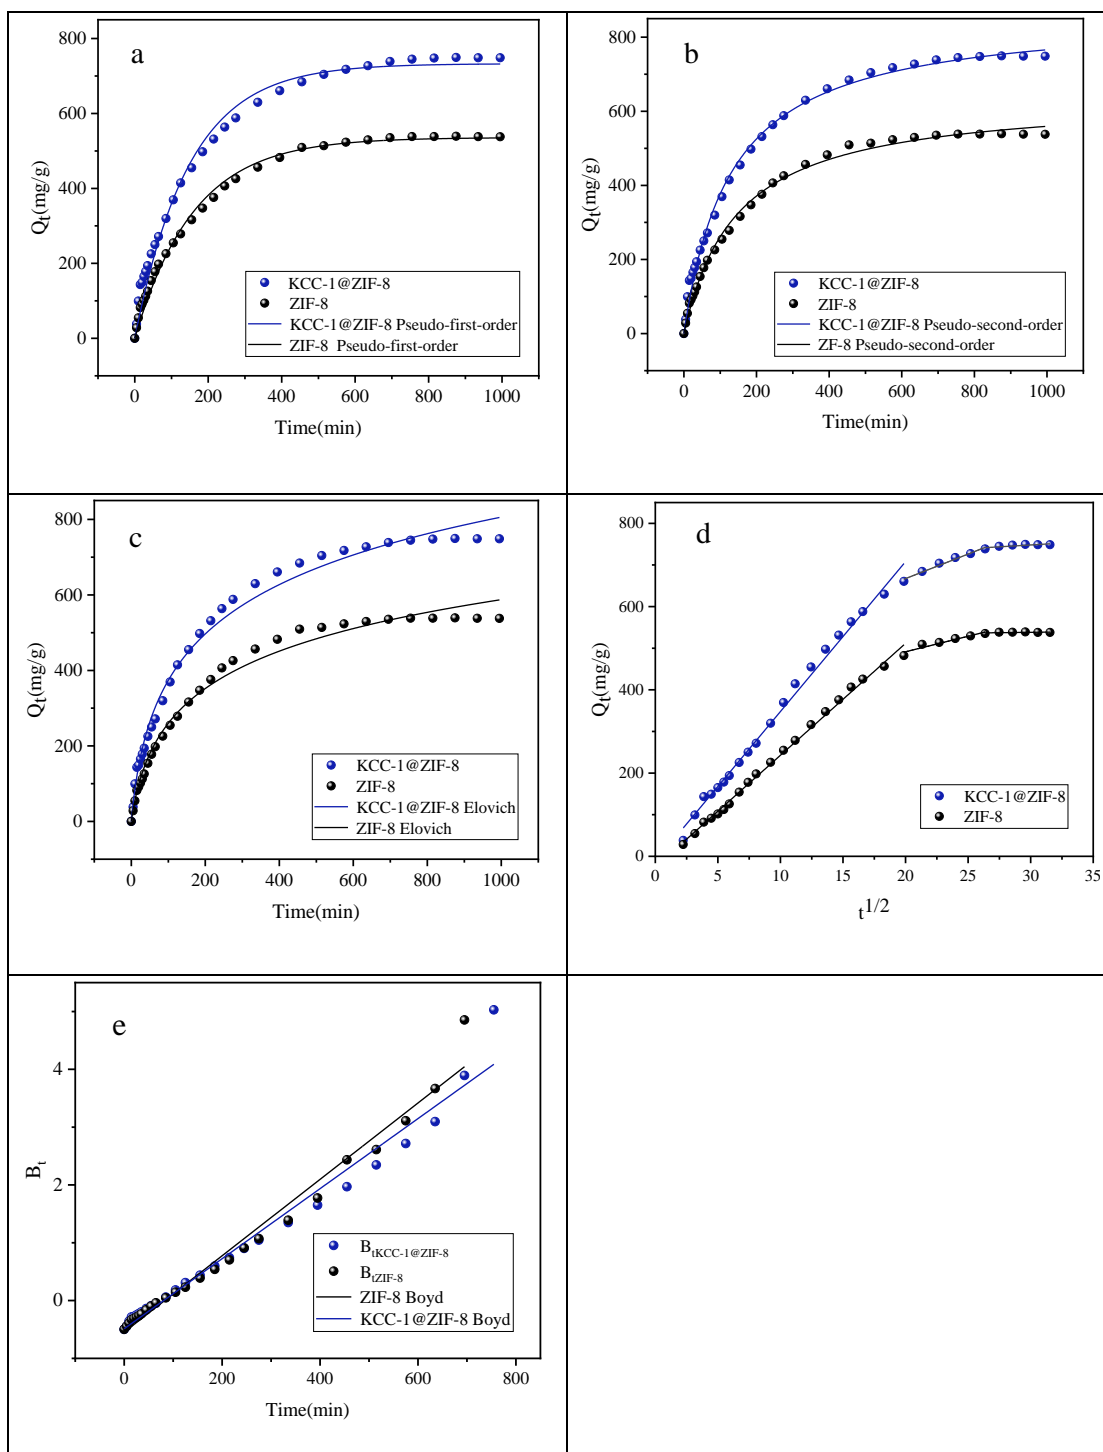

Fig. S2. Pseudo-first-order (PFO) (a), Pseudo-second-order (PSO) (b), Elovich(c), Weber-Morris intraparticle diffusion(d) and Boyd kinetic models for TC adsorption by KCC-1@ ZIF-8 and ZIF-8 nanocomposites

Table S1. Comparison of the adsorption performance between ZIF-8@ KCC-1 and other adsorbents.

| Adsorbent    | Adsorption capacity | Adsorption time | Reuse frequency | Reuse rate | Ref.      |
|--------------|---------------------|-----------------|-----------------|------------|-----------|
| MGOS         | 473.0 mg/g          | 18 h            | —               | —          | [37]      |
| Cu-ZIF-8     | 156.5 mg/g          | 1 h             | 4               | 89.3%      | [38]      |
| Co/N-Mcs     | 344.8 mg/g          | 0.67 h          | 5               | 86%        | [39]      |
| BC           | 274.8 mg/g          | 19 h            | —               | —          | [40]      |
| CH-8         | 541.3 mg/g          | 2 h             | 4               | 82%        | [41]      |
| GO           | 313.0 mg/g          | 1.5 h           | —               | —          | [42]      |
| MBCP         | 476.0 mg/g          | 1 h             | 5               | 92%        | [43]      |
| KCC-1@ ZIF-8 | 751.46 mg/g         | 11 h            | 3               | 91%        | this work |
